# Supplementary material for: A 0.05 V driven ammonia gas sensor based on an organic diode with a top porous layered electrode and an air-stable sensing film
Source: Royal Society of Chemistry journal article supplement (doi:10.1039/c8tc06364h), 2019-01-01
Supplement: c8tc06364h1.pdf [file c8tc06364h1.pdf]

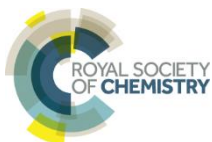

Journal Name

ARTICLE

## Supplementary Information

### **A 0.05 V driven ammonia gas sensor based on an organic diode with a top porous layered electrode and the air-stable sensing film**

Govindasamy Madhaiyan<sup>a</sup>, Chao-Hsuan Chen<sup>b</sup>, Yi-Chu Wu<sup>d</sup>, Sheng-Fu Horng<sup>d</sup>, Hsiao-Wen Zan<sup>\*b</sup>, Hsin-Fei Meng<sup>\*c</sup> and Hong-Cheu Lin<sup>\*a</sup>

<sup>a</sup>*Department of Materials science and Engineering National Chiao Tung University, 1001 Ta Hsueh Rd. Hsinchu, Taiwan.*

<sup>b</sup>*Department of Photonics and Institute of Electro-Optical Engineering, National Chiao Tung University, 1001 Ta Hsueh Rd. Hsinchu, Taiwan.*

<sup>c</sup>*Institute of Physics, National Chiao Tung University, 1001 Ta Hsueh Rd.*

*Hsinchu, Taiwan*

<sup>d</sup>*Department of Electrical Engineering, National Tsing Hua University, Taiwan*

\*Corresponding author E-mails: [hsiaowen@mail.nctu.edu.tw](mailto:hsiaowen@mail.nctu.edu.tw) (H.W. Zan),

[linhc@mail.nctu.edu.tw](mailto:linhc@mail.nctu.edu.tw) (H.C. Lin), [meng@mail.nctu.edu.tw](mailto:meng@mail.nctu.edu.tw) (H. F. Meng)

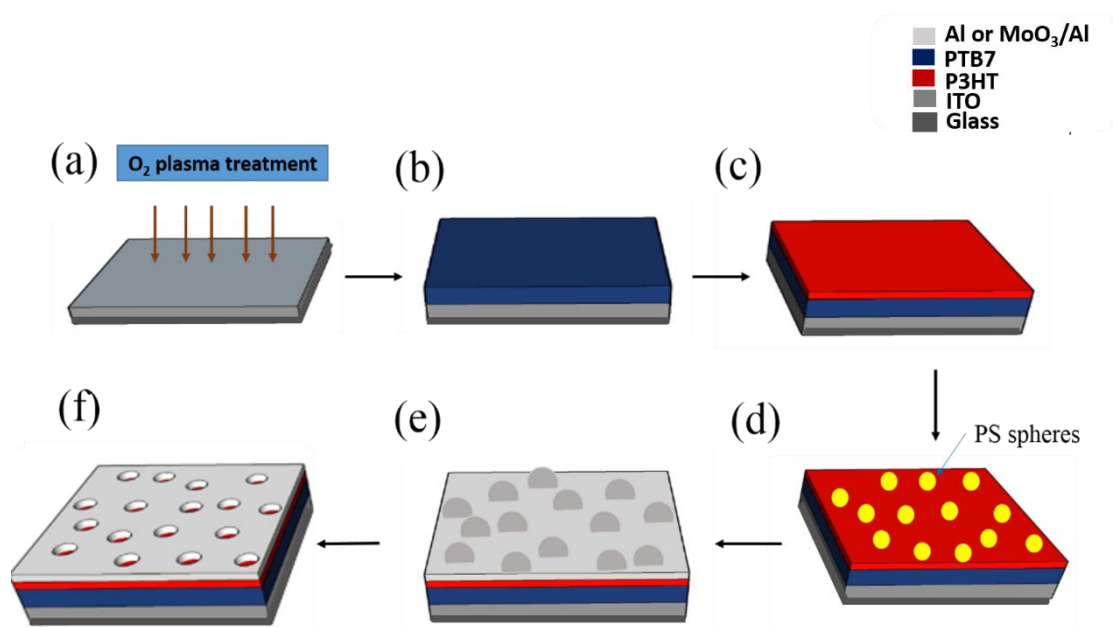

**Fig. S1** Schematic illustration of fabrication process. (a) An ITO substrate was treated by the O<sub>2</sub> plasma. The sensing layer (PTB7) and the surface modification layer (P3HT) are deposited in (b) and in (c), respectively. (d) The PS spheres were absorbed onto the P3HT. (e) top electrode was thermal evaporated. (f) After removing PS spheres by 3M scotch tape, the top electrode with nanometer pores is formed.

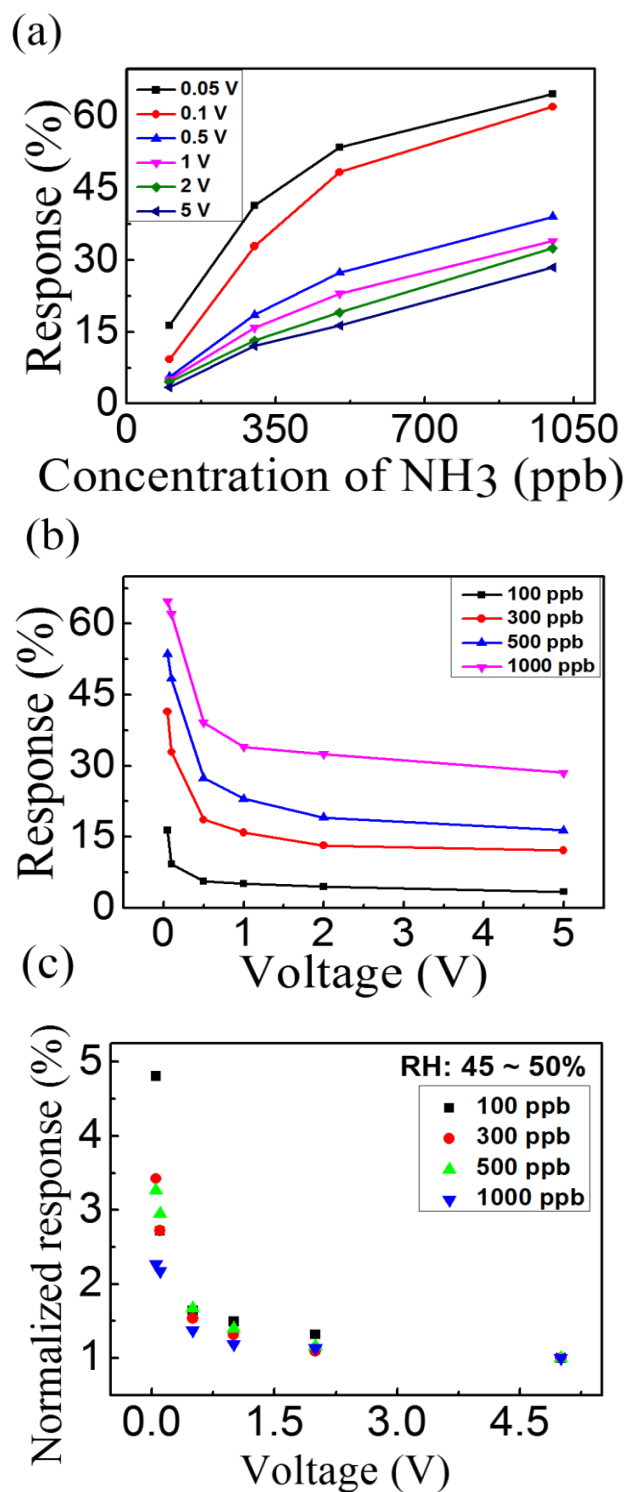

**Fig. S2** Without NaOH tube, RH = 45-50%. (a) The sensing response as a function of ammonia concentration at different operating voltages (0.05 V to 5 V). (b) The sensing response as a function of operating voltage at various ammonia concentration. (c) The normalized sensor response, which is the response at different voltages divided by the response at 5 V, as a function of operating voltage with different ammonia concentration.

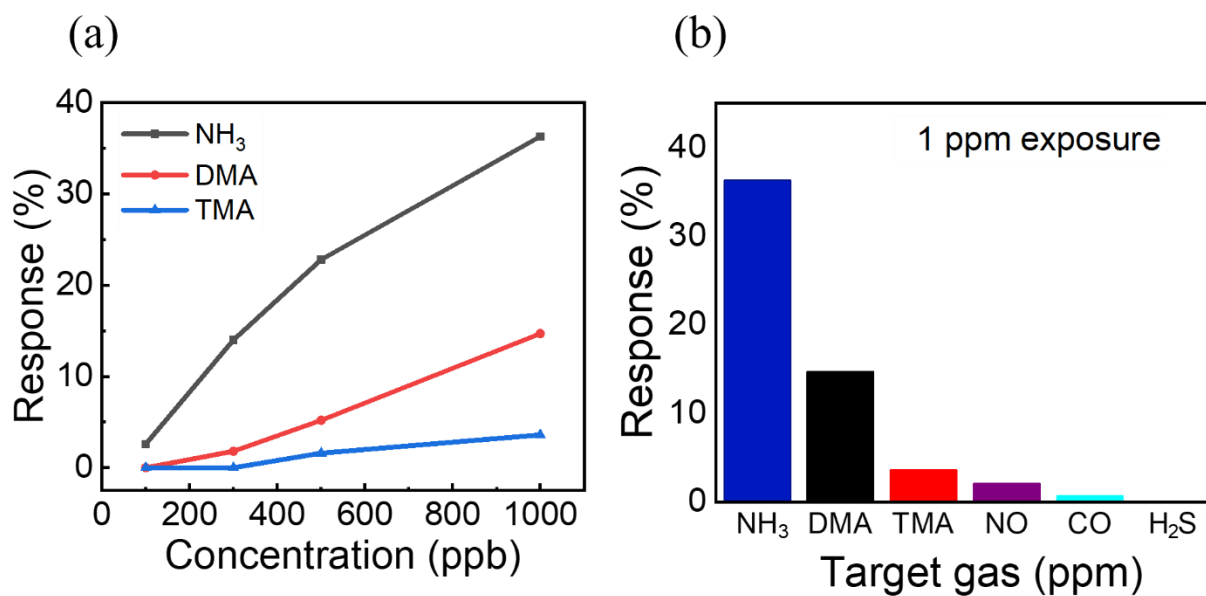

**Fig. S3** Selectivity test of proposed sensor with MoO<sub>3</sub>/Al electrode. (a) The sensing response as a function of amine gases (NH<sub>3</sub>, DMA, and TMA) at 0.5 V. (b) The sensing response as a function of different target gases (NH<sub>3</sub>, DMA, TMA, NO, CO, and H<sub>2</sub>S) at 1 ppm.

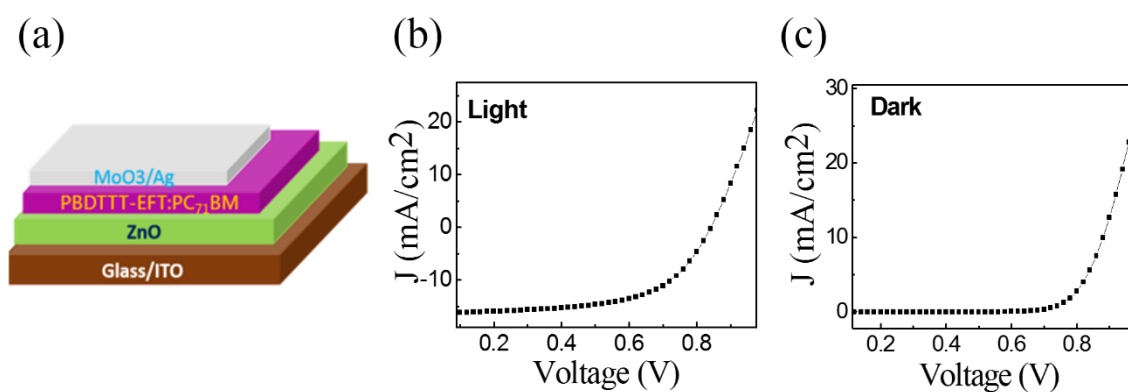

**Fig. S4** (a) The schematic diagram of OPV. (b) and (c) are the current density as a function of voltage under light and in dark, respectively.

**Table S1** The key parameters of the fabricated OPV

| Efficiency (%) | $J_{sc}$ mA/cm <sup>2</sup> | $V_{oc}$ (V) | Fill factor (%) |
|----------------|-----------------------------|--------------|-----------------|
| 8.223          | 16.395                      | 0.842        | 0.596           |

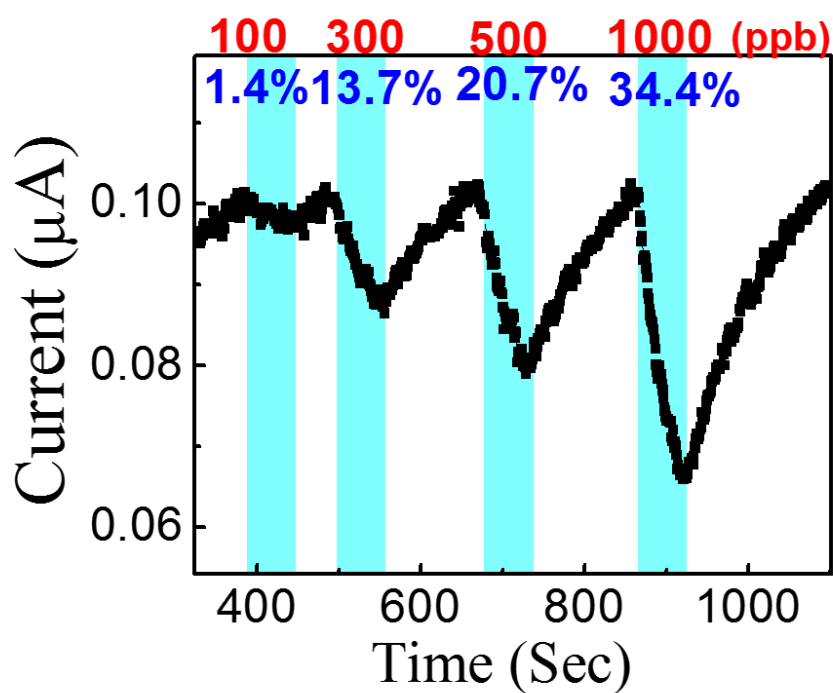

**Fig. S5** The real time sensing curve for the OPV-directly-biased PTB7 sensor without applying external bias.

## Notes and references

- 1 L.Y. Chang, M.Y. Chuang, H.W. Zan, H.F. Meng, C.J. Lu, P.H. Yeh and J.N. Chen, *ACS Sens*, 2017, **2**, 531-539.
- 2 M. Y. Chuang, C. C. Chen, H.W. Zan, H.F. Meng and C.J. Lu, *ACS Sens*, 2017, **2**, 1788-1795.
- 3 M. Y. Chuang, Y.T. Lin, T.W. Tung, L.Y. Chang, H.W. Zan, H.F. Meng, C.J. Lu and Y.T. Tao, *Sens and Actuators: B*, 2018, **260**, 593-600.
